# Supplementary material for: Coaxial multi-shelled TiO2 nanotube arrays for dye sensitized solar cells
Source: Royal Society of Chemistry journal article supplement (doi:10.1039/c2jm15354h), 2012-01-01
Supplement: c2jm15354h.pdf [file c2jm15354h.pdf]

## Supporting Information

# Coaxial Multi-shelled TiO<sub>2</sub> Nanotube Arrays for Dye Sensitized Solar Cells

Jijun Qiu<sup>1</sup>, Fuwei Zhuge<sup>1</sup>, Xiaomin Li<sup>1,\*</sup>, Xiangdong Gao<sup>1</sup>, Xiaoyan Gan<sup>1</sup>, Lin Li<sup>2</sup>,  
Bingbing Wen<sup>2</sup>, Zhisheng Shi<sup>2,\*</sup>, Yoon-Hwae Hwang<sup>3</sup>

<sup>1</sup> State Key Laboratory of High Performance Ceramics and Superfine Microstructures,  
Shanghai Institute of Ceramics, Chinese Academy of Sciences, Shanghai 200050, China

<sup>2</sup> School of Electrical and Computer Engineering, University of Oklahoma, Norman,  
Oklahoma 73019, USA

<sup>3</sup> Department of Nano-Materials Engineering & BK 21 Nano Fusion Technology Division,  
Pusan National University, Miryang 627-706, Korea

E-mail: [Lixm@mail.sic.ac.cn](mailto:Lixm@mail.sic.ac.cn), [shi@ou.edu](mailto:shi@ou.edu)

Phone: 86-021-52412554, 01-405-525-4292

### Contents:

**Figure S1.** The schematic fabrication procedure of LbL-AR for TiO<sub>2</sub> shells

**Figure S2.** The high-magnification FESEM images of ZnO spacing layer and multi-shelled TiO<sub>2</sub> NTs.

**Figure S3.** The typical FESEM and TEM images of multi-shelled TiO<sub>2</sub> NTAs with different shell numbers.

**Figure S4.** Typical high-magnification top-view FESEM images of broken tips of multi-shelled TiO<sub>2</sub> NTs with different shell numbers.

**Figure S6.** The typical characteristics of high-density triple-shelled TiO<sub>2</sub> NTAs.

**Figure S6.** The equivalent circuit model of the multi-shelled TiO<sub>2</sub> NTAs DSSCs.

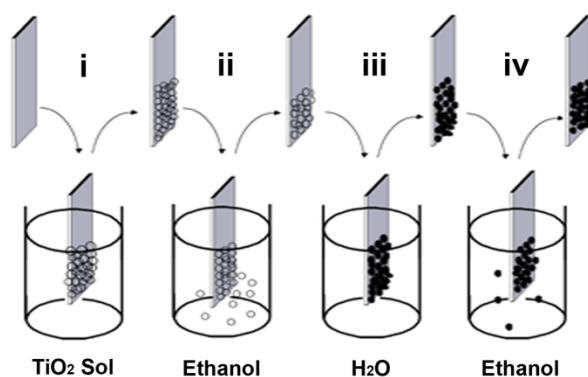

**Figure S1.** The schematic illustration for a cycle of LbL-AR procedure.

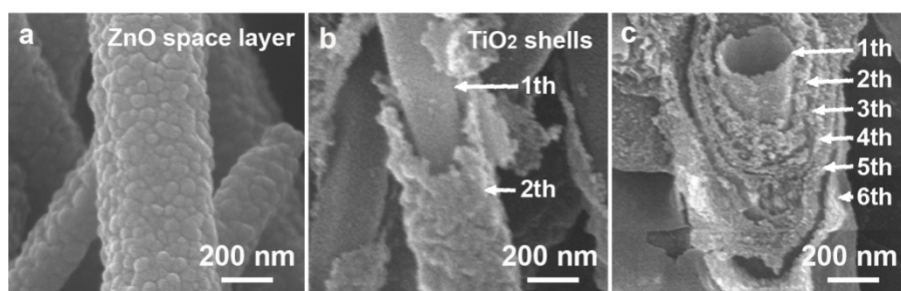

**Figure S2.** The high-magnification FESEM images of (a) ZnO space layer deposited over TiO<sub>2</sub> shells by SG technology, (b) double-shelled TiO<sub>2</sub> NT and (c) sextuple-shelled TiO<sub>2</sub> NTs.

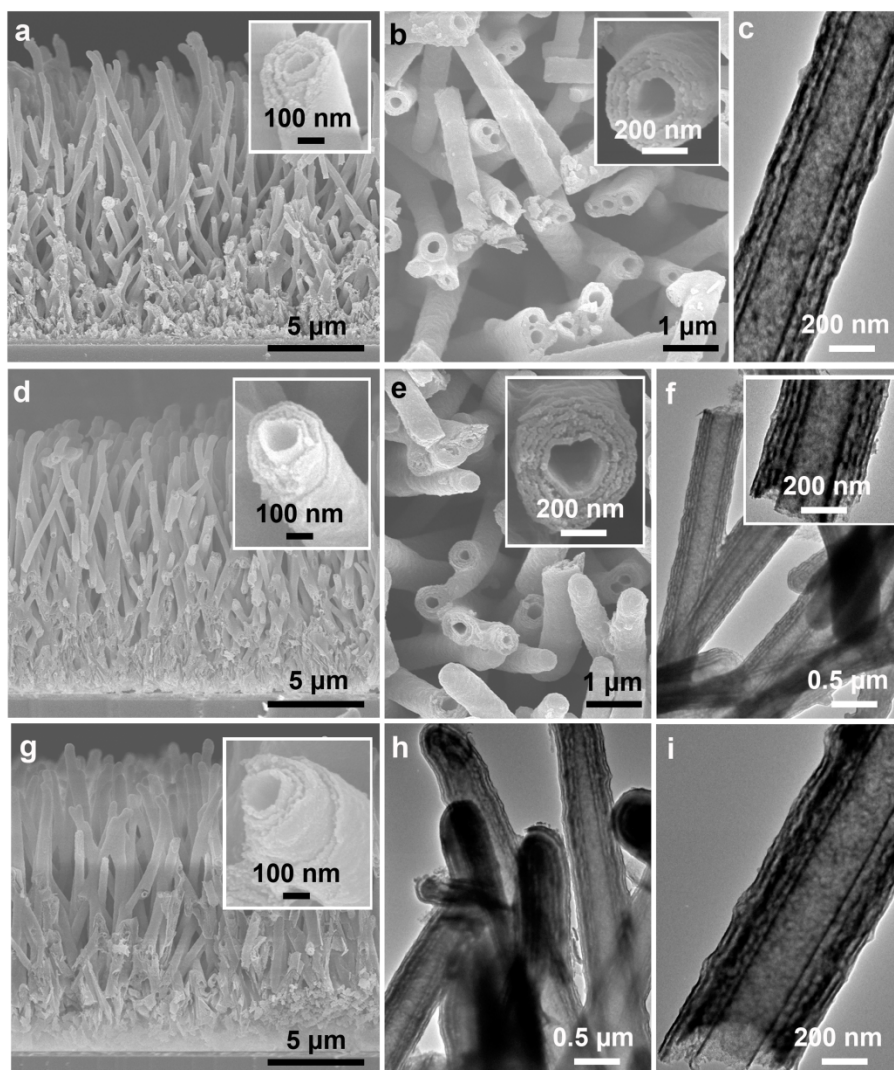

**Figure S3.** The typical FESEM and TEM images of multi-shelled TiO<sub>2</sub> NTAs with (a-c) quadruple, (d-f) quintuple- and (g-i) sextuple shells. Low-magnification side-view FESEM images of (a) quadruple, (d) quintuple and (g) sextuple-shelled TiO<sub>2</sub> NTAs. High-magnification top-view FESEM images of (b) quadruple- and (e) quintuple-shelled TiO<sub>2</sub> NTAs. Low-magnification TEM images of (f) quintuple- and (h) sextuple-shelled TiO<sub>2</sub> NTAs. High magnification TEM images of (c) quadruple- and (i) sextuple-shelled TiO<sub>2</sub> NTs.

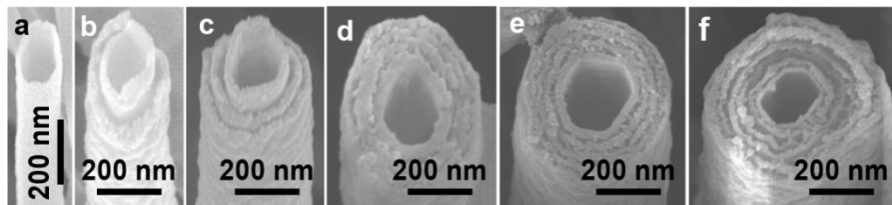

**Figure S4.** Typical high-magnification top-view FESEM images of broken tip of multi-shelled TiO<sub>2</sub> NTs with different shell numbers. (a) Single-, (b) double-, (c) triple-, (d) quadruple-, (e) quintuple- and (f) sextuple-shelled TiO<sub>2</sub> NT.

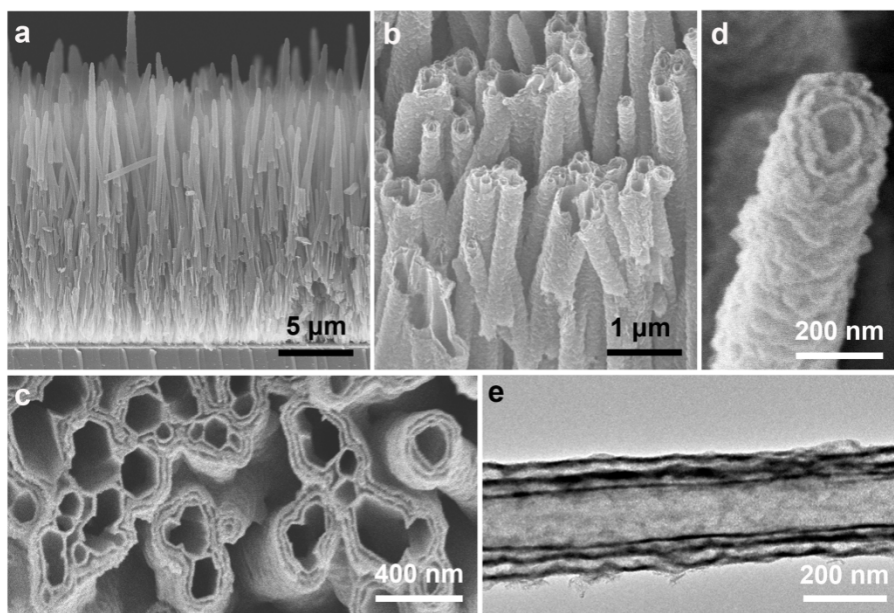

**Figure S5.** The typical characteristics of high-density triple-shelled TiO<sub>2</sub> NTAs. (a) low-, (b) middle magnification side-view FESEM images, (c) high magnification top-view FESEM image captured from broken edges of triple-shelled TiO<sub>2</sub> NTAs. (d) FESEM and (e) TEM images of an individual triple-shelled TiO<sub>2</sub> NT.

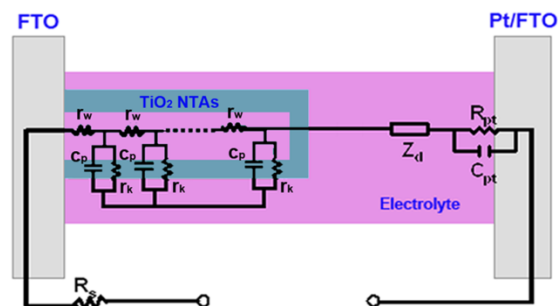

**Figure S6.** The equivalent circuit model of the multi-shelled TiO<sub>2</sub> NTAs DSSCs. The simulated electron transport parameters include the electron transport resistance ( $R_w=r_wL$ ,  $r_w$  is component of the equivalent circuit, and  $L$  is the thickness of the multi-shelled TiO<sub>2</sub> NTAs photoanode), recombination resistance ( $R_k=r_k/L$ ,  $r_k$  is component of the equivalent circuit), the capacitance of the electrical double layer ( $C_p=c_pL$ ,  $c_p$  is component of the equivalent circuit), the electron collect efficiency ( $\eta_{cc}=1- R_w/R_k$ ).
